# Supplementary material
Source: Springer Nature journal article supplement (https://www.springermedizin.de/resource/supplementary/13075_2011_3586_MOESM3_ESM.pdf/9694834)

**A**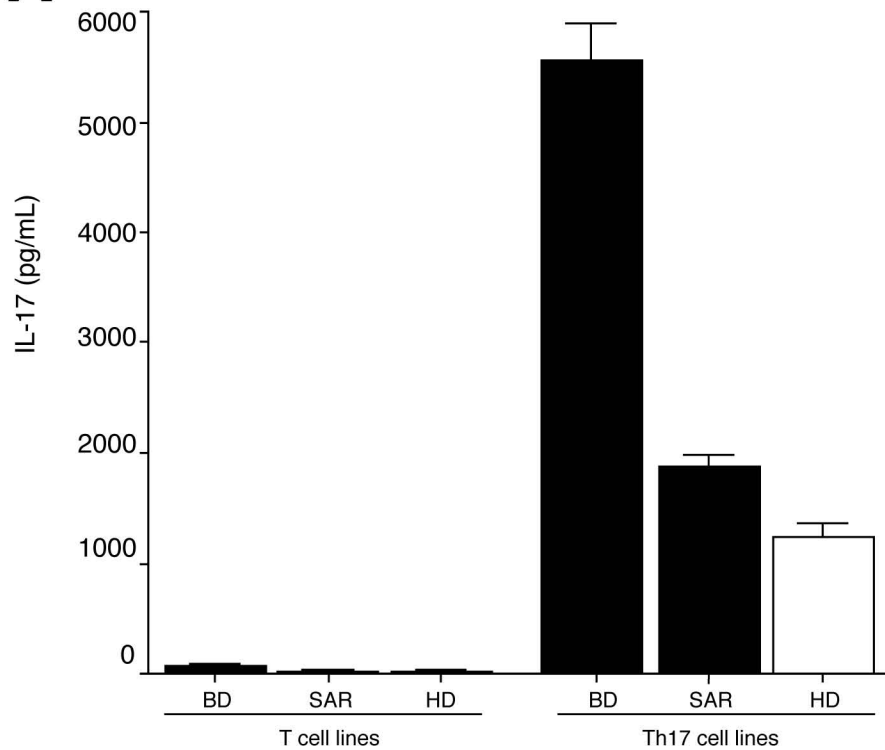

CD4<sup>+</sup> T cells  
+ anti-CD3/CD28 abs

CD4<sup>+</sup> T cells  
+ anti-CD3/CD28 abs  
+ human rIL-1 $\beta$   
+ human rIL-6  
+ human rIL-23  
+ human rTNF- $\alpha$   
+ anti-IL-4 abs  
+ anti-IFN- $\gamma$  abs

**B**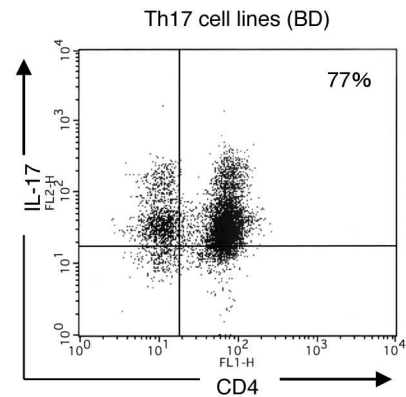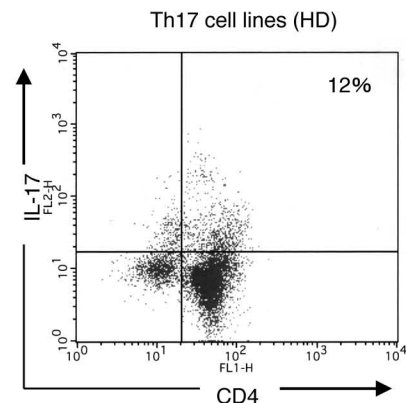

Supplement: MOESM3 [file 9694834]
